# Supplementary material for: CARK1 phosphorylates subfamily III members of ABA receptors
Source: PubMed Central journal article supplement (PMC6322571; doi:10.1093/jxb/ery374), 2018-10-30
Supplement: ery374_suppl_supplementary_material.pdf [file ery374_suppl_supplementary_material.pdf]

## Supporting Information

Article title: **CARK1 phosphorylates ABA receptors subfamily III members**

Authors: Xiaoyi Li<sup>¶</sup>, Xiangge Kong<sup>¶</sup>, Qi Huang<sup>¶</sup>, Hu Ge, Qian Zhang, Liang Zhang, Gaoming Li, Lu Peng, Zhibin Liu, Jianmei Wang, Xufeng Li, Ying Yang\*

\*Author for correspondence: Yi Yang ([yangyi528@scu.edu.cn](mailto:yangyi528@scu.edu.cn))

<sup>¶</sup> These authors contributed equally to this work

The following Supporting Information is available for this article:

Supporting Online Figures (Fig. S1—S2)

Supporting Online Table (Table S1)

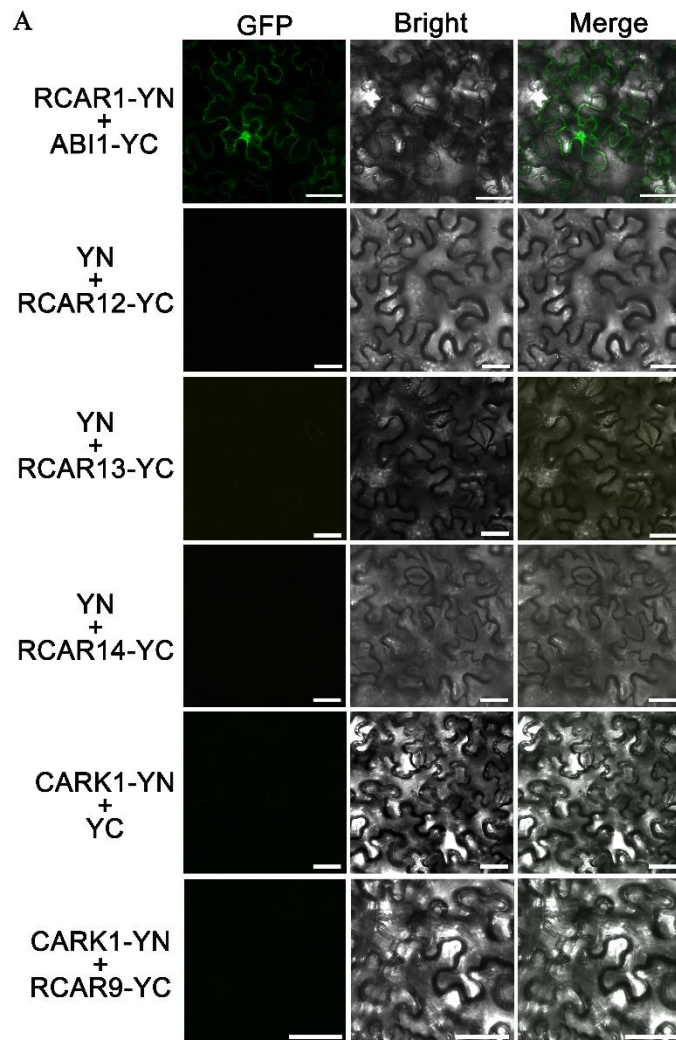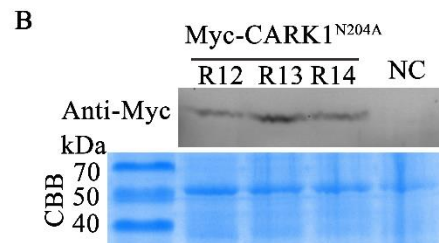

**Supplementary Fig. S1 Controls of BiFC assay.** **A**, Co-expression of RCAR1-YN and ABI1-YC (positive control) in leaves of *N. benthamiana*, yielded fluorescence signals both in the cytosol and in the nucleus. No signal of YFP fluorescence was detected after co-expression of YN and with RCAR12-YC, RCAR13-YC, RCAR14-YC, YC and **RCAR9-YC** with CARK1-YN. Scale bar, 50  $\mu$ m. **B**, Western blot analyzing CARK1<sup>N204A</sup> expression levels in tobacco epidermal cells, co-infiltration CARK1<sup>N204A</sup> with RCAR12, RCAR13 and RCAR14, respectively. NC, Crude extracts without plasmids transfection were used as the negative control.

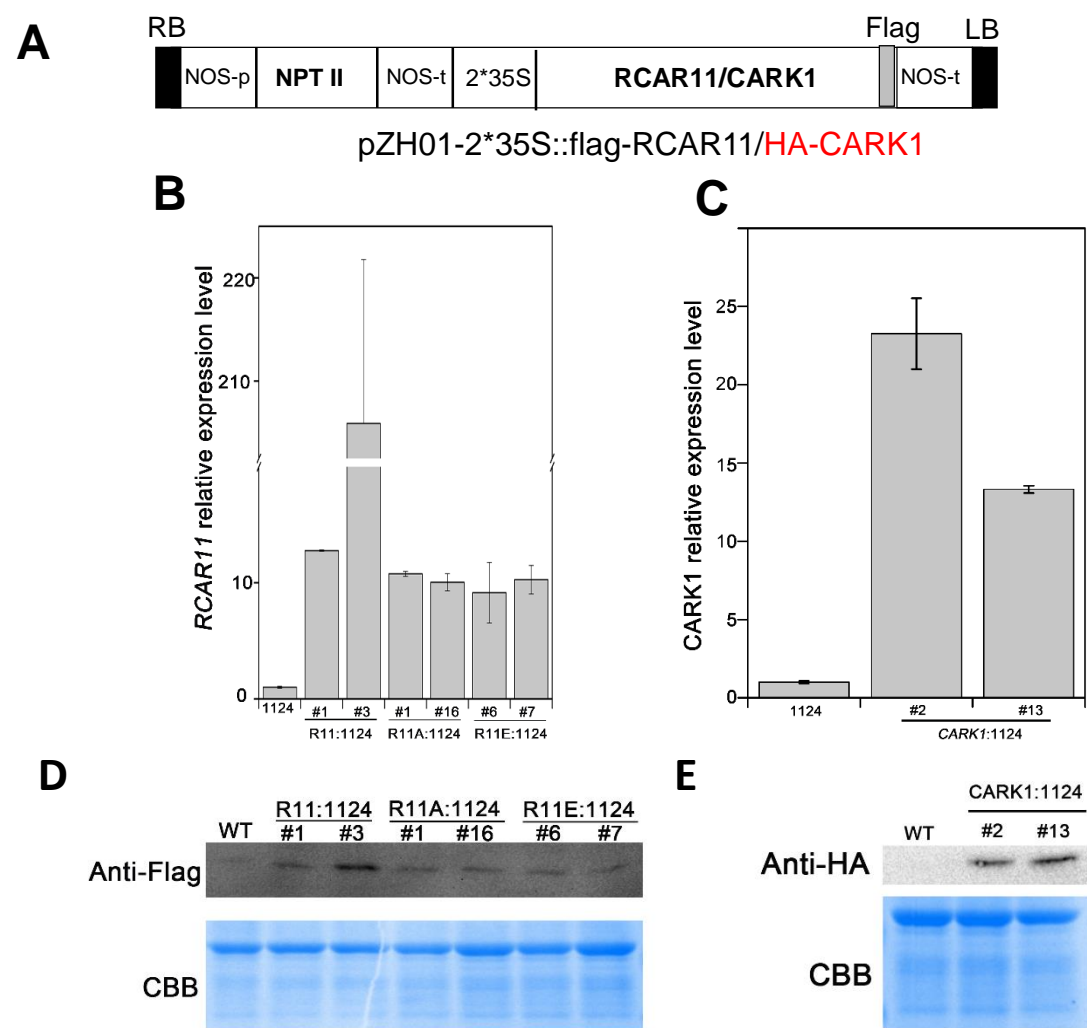

**Supplementary Fig. S2 Construct used for plant and identification of transgenic lines by qRT-PCR and protein levels.** **A**, Construct used for transgenic plant, RB, right T-DNA border, LB, left T-DNA border; Nos-p, NOS promoter; NOS-t, NOS terminator, 35S, cauliflower mosaic virus (CaMV) 35S promoter; NPTII, neomycin phosphotransferase II. **B and C**, Real time-PCR analysis of the 1124, R11:1124, R11A:1124, R11E:1124, CARK1:1124. Expression levels of *RCAR11* or *CARK1* transcripts were determined by qRT-PCR using gene-specific primers. ACTIN2/8 mRNA level were used as the internal control. **D and E**, western blot analyzing protein levels of transgenic plants. Anti-Flag was used to detect RCAR11:1124, RCAR11A:1124 and RCAR11E:1124, and anti-HA was used to detect CARK1:1124. CBB (Coomassie Brilliant Blue) stain is shown as loading control.

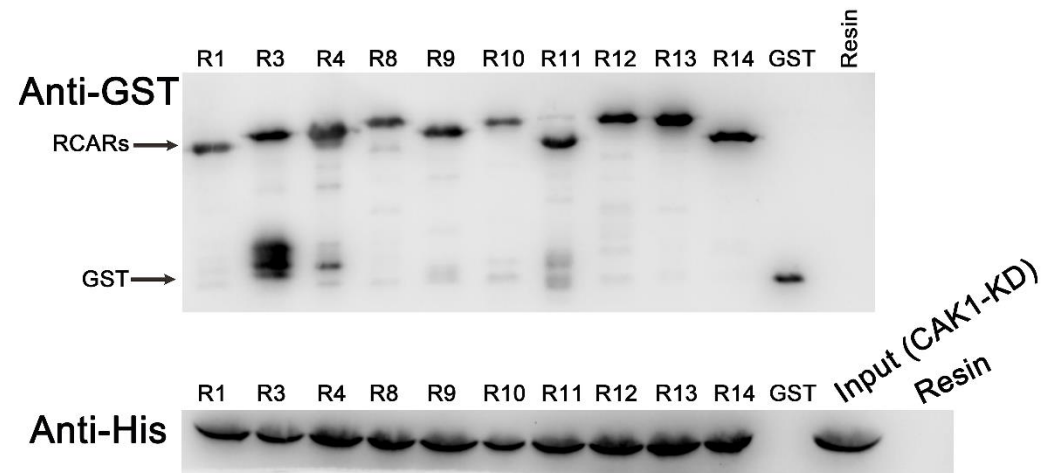

**Supplementary Fig. S3 *In vitro* GST pull-down assay of CARK1-KD interaction with RCARs.**

6xHis fused CARK1-KD was incubated with, GST-tagged RCARs as indicated, respectively. The RCARs proteins, GST or the negative control (Resin) were analyzed by anti-GST (up) and immunoblotting with antibodies against the His-tag (bottom).

**Table S1 Primers used in this paper**

| Assays                                        | Genes                                               | Primer sequences (5`-3`)                              |
|-----------------------------------------------|-----------------------------------------------------|-------------------------------------------------------|
| Primers for GST-pull down                     | RCAR1                                               | F ( <i>EcoRI</i> ): GGAATTCATGGACGGCGTTGAAGGCG        |
|                                               |                                                     | R ( <i>XhoI</i> ): CCGCTCGAGTCACTGAGTAATGTCCTGAGAAGCC |
|                                               | RCAR3                                               | F ( <i>EcoRI</i> ): GGAATTCATGGAAGCTAACGGGATTG        |
|                                               |                                                     | R ( <i>XhoI</i> ): CCGCTCGAGTCAAGCGTAATCTGGAACATC     |
|                                               | RCAR4                                               | F ( <i>EcoRI</i> ): GGAATTCATGAACGGTGACGAAACAAGAAG    |
|                                               |                                                     | R ( <i>XhoI</i> ): CCGCTCGAGTATCTTCTTCTCCATAGATTCT    |
|                                               | RCAR8                                               | F ( <i>BamHI</i> ): GGAATTCATGGAAGCTAACGGGATTG        |
|                                               |                                                     | R ( <i>EcoRI</i> ): CCGCTCGAGTCAAGCGTAATCTGGAACATC    |
|                                               | RCAR9                                               | F ( <i>EcoRI</i> ): GGAATTCATGCCAACGTCGATACAGTT       |
|                                               |                                                     | R ( <i>XhoI</i> ): CCGCTCGAGTTACGAGAATTTAGAAGTGTTCTCG |
|                                               | RCAR10                                              | F ( <i>EcoRI</i> ): GGAATTCATGCCAACGTCGATACAGTT       |
|                                               |                                                     | R ( <i>XhoI</i> ): CCGCTCGAGCAGAGACATCTTCTTCTTGCTC    |
|                                               | RCAR11                                              | F ( <i>BamHI</i> ): CGCGGATCCATGGCGAATTCAGAGTCCTC     |
|                                               |                                                     | R ( <i>SmaI</i> ): TCCCCCGGGCCTAACCTGAGAAGAGTTGT      |
| RCAR12                                        | F ( <i>BamHI</i> ): CGCGGATCCATGGCGAATTCAGAGTCCTC   |                                                       |
|                                               | R ( <i>SmaI</i> ): TCCCCCGGGCCTAACCTGAGAAGAGTTGT    |                                                       |
| RCAR13                                        | F ( <i>EcoRI</i> ): GGAATTCATGAATCTTGCTCCAATCCA     |                                                       |
|                                               | R ( <i>XhoI</i> ): CCGCTCGAGTCAGGTCGGAGAAGCCGTGG    |                                                       |
| RCAR14                                        | F ( <i>EcoRI</i> ): GGAATTCATGAGTCATCCCCGG          |                                                       |
|                                               | R ( <i>XhoI</i> ): CCGCTCGAGTTATTCATCATCATGCATAGGTG |                                                       |
| Primers for BiFC                              | RCAR9                                               | F ( <i>BamHI</i> ): CGGGATCCATGCCAACGTCGATACAGTTT     |
|                                               |                                                     | R ( <i>SalI</i> ): TCCGTCGACCGAGAATTTAGAAGTGTTCTCG    |
|                                               | RCAR12                                              | F ( <i>BamHI</i> ): CGCGGATCCATGGCGAATTCAGAGTCCTC     |
|                                               |                                                     | R ( <i>SalI</i> ): TCCGTCGACAACCTGAGAAGAGTTGT         |
|                                               | RCAR13                                              | F ( <i>BamHI</i> ): CGCGGATCCATGAATCTTGCTCCAATCCA     |
| R ( <i>SalI</i> ): TCCGTCGACGGTCGGAGAAGCCGTGG |                                                     |                                                       |
| RCAR14                                        | F ( <i>BamHI</i> ): CGCGGATCCATGAGTCATCCCCGG        |                                                       |
|                                               | R ( <i>SalI</i> ): TCCGTCGACTTCATCATCATGCATAGGTG    |                                                       |
| Primers for CoIP                              | RCAR12                                              | F ( <i>BamHI</i> ): CGCGGATCCATGGCGAATTCAGAGTCCTC     |
|                                               |                                                     | R ( <i>SalI</i> ): TCCGTCGACAACCTGAGAAGAGTTGT         |
|                                               | RCAR13                                              | F ( <i>BamHI</i> ): CGCGGATCCATGAATCTTGCTCCAATCCA     |
|                                               |                                                     | R ( <i>SalI</i> ): TCCGTCGACGGTCGGAGAAGCCGTGG         |
| CARK1/ CARK1m                                 | F ( <i>SalI</i> ): TCCGTCGACATGGGCTGCTTTGTTGTTGT    |                                                       |
|                                               | R ( <i>XbaI</i> ): GCTCTAGAATACGGGTTCTGTGTGGAGTC    |                                                       |
| Primers for site-directed mutagenesis         | RCAR12 <sup>T105A</sup>                             | CGAGTGGGATGCGCGCGCGACGTGAAC                           |
|                                               |                                                     | CGCGCATCCCCTCGCATCTCGAAATC                            |
|                                               | RCAR13 <sup>T101A</sup>                             | GATTAAGTTGGGGCGATAAGGGAAG                             |
|                                               |                                                     | CGCCCCAACTTTAATCTTTTGTATGC                            |
|                                               | RCAR14 <sup>S81A</sup>                              | GGTGACGTCGGAGCGGTCAGAGAAG                             |
|                                               |                                                     | CGCTCCGACGTCACCATCACCGGAG                             |
